# Supplementary material
Source: ML conference proceedings conference paper supplement (https://openreview.net/forum?id=1iXmvOHPMa)
Supplement: supplementary_material [file attachment]

---

# Formatting Instructions For MAEB 2025

---

Anonymous Author(s)

Affiliation

Address

email

## Abstract

The abstract paragraph should be indented  $\frac{1}{2}$  inch (3 picas) on both the left- and right-hand margins. Use 10 point type, with a vertical spacing (leading) of 11 points. The word **Abstract** must be centered, bold, and in point size 12. Two line spaces precede the abstract. The abstract must be limited to one paragraph.

## 1 Submission of papers to MAEB 2025

Please read the instructions below carefully and follow them faithfully.

### 1.1 Style

Papers to be submitted to MAEB 2025 must be prepared according to the instructions presented here. Papers may only be up to **nine** pages long, including figures. Additional pages *containing only acknowledgments and references* are allowed. Papers that exceed the page limit will not be reviewed, or in any other way considered for presentation at the conference.

Authors are required to use the MAEB L<sup>A</sup>T<sub>E</sub>X style files obtainable at the MAEB website as indicated below. Please make sure you use the current files and not previous versions. Tweaking the style files may be grounds for rejection.

### 1.2 Retrieval of style files

The style files for MAEB and other conference information are available on the website at

<http://www.maeb2025.org/>

The file `maeb_2025.pdf` contains these instructions and illustrates the various formatting requirements your MAEB paper must satisfy.

The only supported style file for MAEB 2025 is `maeb_2025.sty`, rewritten for L<sup>A</sup>T<sub>E</sub>X 2<sub>ε</sub>. **Previous style files for L<sup>A</sup>T<sub>E</sub>X 2.09, Microsoft Word, and RTF are no longer supported!**

The L<sup>A</sup>T<sub>E</sub>X style file contains three optional arguments: `final`, which creates a camera-ready copy, `preprint`, which creates a preprint for submission to, e.g., arXiv, and `nonatbib`, which will not load the `natbib` package for you in case of package clash.

**Preprint option** If you wish to post a preprint of your work online, e.g., on arXiv, using the MAEB style, please use the `preprint` option. This will create a nonanonymized version of your work with the text “Preprint. Work in progress.” in the footer. This version may be distributed as you see fit, as long as you do not say which conference it was submitted to. Please **do not** use the `final` option, which should **only** be used for papers accepted to MAEB.

30 At submission time, please omit the final and preprint options. This will anonymize your  
31 submission and add line numbers to aid review. Please do *not* refer to these line numbers in your  
32 paper as they will be removed during generation of camera-ready copies.

33 The file `maeb_2025.tex` may be used as a “shell” for writing your paper. All you have to do is  
34 replace the author, title, abstract, and text of the paper with your own.

35 The formatting instructions contained in these style files are summarized in Sections 2, 3, and 4  
36 below.

## 37 **2 General formatting instructions**

38 The text must be confined within a rectangle 5.5 inches (33 picas) wide and 9 inches (54 picas) long.  
39 The left margin is 1.5 inch (9 picas). Use 10 point type with a vertical spacing (leading) of 11 points.  
40 Times New Roman is the preferred typeface throughout, and will be selected for you by default.  
41 Paragraphs are separated by  $\frac{1}{2}$  line space (5.5 points), with no indentation.

42 The paper title should be 17 point, initial caps/lower case, bold, centered between two horizontal  
43 rules. The top rule should be 4 points thick and the bottom rule should be 1 point thick. Allow  $\frac{1}{4}$  inch  
44 space above and below the title to rules. All pages should start at 1 inch (6 picas) from the top of the  
45 page.

46 For the final version, authors’ names are set in boldface, and each name is centered above the  
47 corresponding address. The lead author’s name is to be listed first (left-most), and the co-authors’  
48 names (if different address) are set to follow. If there is only one co-author, list both author and  
49 co-author side by side.

50 Please pay special attention to the instructions in Section 4 regarding figures, tables, acknowledgments,  
51 and references.

## 52 **3 Headings: first level**

53 All headings should be lower case (except for first word and proper nouns), flush left, and bold.

54 First-level headings should be in 12-point type.

### 55 **3.1 Headings: second level**

56 Second-level headings should be in 10-point type.

#### 57 **3.1.1 Headings: third level**

58 Third-level headings should be in 10-point type.

59 **Paragraphs** There is also a `\paragraph` command available, which sets the heading in bold, flush  
60 left, and inline with the text, with the heading followed by 1 em of space.

## 61 **4 Citations, figures, tables, references**

62 These instructions apply to everyone.

### 63 **4.1 Citations within the text**

64 The `natbib` package will be loaded for you by default. Citations may be author/year or numeric, as  
65 long as you maintain internal consistency. As to the format of the references themselves, any style is  
66 acceptable as long as it is used consistently.

67 The documentation for `natbib` may be found at

68 <http://mirrors.ctan.org/macros/latex/contrib/natbib/natnotes.pdf>

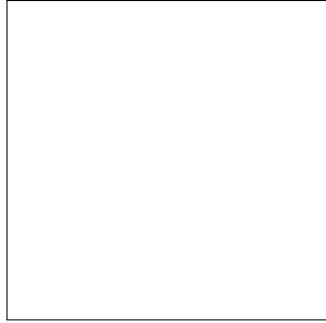

Figure 1: Sample figure caption.

69 Of note is the command `\citet`, which produces citations appropriate for use in inline text. For  
70 example,

71 `\citet{hasselmo}` investigated\dotso

72 produces

73 Hasselmo, et al. (1995) investigated...

74 If you wish to load the `natbib` package with options, you may add the following before loading the  
75 `maeb_2025` package:

76 `\PassOptionsToPackage{options}{natbib}`

77 If `natbib` clashes with another package you load, you can add the optional argument `nonatbib`  
78 when loading the style file:

79 `\usepackage[nonatbib]{maeb_2025}`

80 As submission is double blind, refer to your own published work in the third person. That is, use “In  
81 the previous work of Jones et al. [4],” not “In our previous work [4].” If you cite your other papers  
82 that are not widely available (e.g., a journal paper under review), use anonymous author names in the  
83 citation, e.g., an author of the form “A. Anonymous” and include a copy of the anonymized paper in  
84 the supplementary material.

## 85 4.2 Footnotes

86 Footnotes should be used sparingly. If you do require a footnote, indicate footnotes with a number<sup>1</sup>  
87 in the text. Place the footnotes at the bottom of the page on which they appear. Precede the footnote  
88 with a horizontal rule of 2 inches (12 picas).

89 Note that footnotes are properly typeset *after* punctuation marks.<sup>2</sup>

## 90 4.3 Figures

91 All artwork must be neat, clean, and legible. Lines should be dark enough for purposes of reproduction.  
92 The figure number and caption always appear after the figure. Place one line space before the figure  
93 caption and one line space after the figure. The figure caption should be lower case (except for first  
94 word and proper nouns); figures are numbered consecutively.

95 You may use color figures. However, it is best for the figure captions and the paper body to be legible  
96 if the paper is printed in either black/white or in color.

---

<sup>1</sup>Sample of the first footnote.

<sup>2</sup>As in this example.

Table 1: Sample table title

| Part     |                 |                        |
|----------|-----------------|------------------------|
| Name     | Description     | Size ( $\mu\text{m}$ ) |
| Dendrite | Input terminal  | $\sim 100$             |
| Axon     | Output terminal | $\sim 10$              |
| Soma     | Cell body       | up to $10^6$           |

#### 97 4.4 Tables

98 All tables must be centered, neat, clean and legible. The table number and title always appear before  
99 the table. See Table 1.

100 Place one line space before the table title, one line space after the table title, and one line space after  
101 the table. The table title must be lower case (except for first word and proper nouns); tables are  
102 numbered consecutively.

103 Note that publication-quality tables *do not contain vertical rules*. We strongly suggest the use of the  
104 booktabs package, which allows for typesetting high-quality, professional tables:

105 <https://www.ctan.org/pkg/booktabs>

106 This package was used to typeset Table 1.

#### 107 4.5 Math

108 Note that display math in bare TeX commands will not create correct line numbers for sub-  
109 mission. Please use LaTeX (or AMSTeX) commands for unnumbered display math. (You  
110 really shouldn't be using \$\$ anyway; see <https://tex.stackexchange.com/questions/503/why-is-preferable-to> and <https://tex.stackexchange.com/questions/40492/what-are-the-differences-between-align-equation-and-displaymath> for more infor-  
111 mation.)  
112 mation.)  
113 mation.)

#### 114 4.6 Final instructions

115 Do not change any aspects of the formatting parameters in the style files. In particular, do not modify  
116 the width or length of the rectangle the text should fit into, and do not change font sizes (except  
117 perhaps in the **References** section; see below). Please note that pages should be numbered.

### 118 5 Preparing PDF files

119 Please prepare submission files with paper size "US Letter," and not, for example, "A4."

- 120 • You should directly generate PDF files using `pdflatex`.
- 121 • You can check which fonts a PDF files uses. In Acrobat Reader, select the menu  
122 Files>Document Properties>Fonts and select Show All Fonts. You can also use the program  
123 pdf fonts which comes with xpdf and is available out-of-the-box on most Linux machines.
- 124 • `xfig` "patterned" shapes are implemented with bitmap fonts. Use "solid" shapes instead.
- 125 • The `\bbold` package almost always uses bitmap fonts. You should use the equivalent AMS  
126 Fonts:

127 `\usepackage{amsfonts}`

128 followed by, e.g., `\mathbb{R}`, `\mathbb{N}`, or `\mathbb{C}` for  $\mathbb{R}$ ,  $\mathbb{N}$  or  $\mathbb{C}$ . You can also  
129 use the following workaround for reals, natural and complex:

```
130 \newcommand{\RR}{\mathbb{R}} %real numbers
131 \newcommand{\Nat}{\mathbb{N}} %natural numbers
132 \newcommand{\CC}{\mathbb{C}} %complex numbers
```

133           Note that `amsfonts` is automatically loaded by the `amssymb` package.

134 If your file contains type 3 fonts or non embedded TrueType fonts, we will ask you to fix it.

## 135 **5.1 Margins in L<sup>A</sup>T<sub>E</sub>X**

136 Most of the margin problems come from figures positioned by hand using `\special` or other  
137 commands. We suggest using the command `\includegraphics` from the `graphicx` package.  
138 Always specify the figure width as a multiple of the line width as in the example below:

```
139       \usepackage[pdftex]{graphicx} ...  
140       \includegraphics[width=0.8\linewidth]{myfile.pdf}
```

141 See Section 4.4 in the graphics bundle documentation ([http://mirrors.ctan.org/macros/](http://mirrors.ctan.org/macros/latex/required/graphics/grfguide.pdf)  
142 [latex/required/graphics/grfguide.pdf](http://mirrors.ctan.org/macros/latex/required/graphics/grfguide.pdf))

143 A number of width problems arise when L<sup>A</sup>T<sub>E</sub>X cannot properly hyphenate a line. Please give LaTeX  
144 hyphenation hints using the `\-` command when necessary.

## 145 **References**

146 References follow the acknowledgments in the camera-ready paper. Use unnumbered first-level  
147 heading for the references. Any choice of citation style is acceptable as long as you are consistent. It  
148 is permissible to reduce the font size to `small` (9 point) when listing the references. Note that the  
149 Reference section does not count towards the page limit.

150 [1] Alexander, J.A. & Mozer, M.C. (1995) Template-based algorithms for connectionist rule extraction. In  
151 G. Tesauro, D.S. Touretzky and T.K. Leen (eds.), *Advances in Neural Information Processing Systems 7*, pp.  
152 609–616. Cambridge, MA: MIT Press.

153 [2] Bower, J.M. & Beeman, D. (1995) *The Book of GENESIS: Exploring Realistic Neural Models with the*  
154 *GENeral NEural Simulation System*. New York: TELOS/Springer-Verlag.

155 [3] Hasselmo, M.E., Schnell, E. & Barkai, E. (1995) Dynamics of learning and recall at excitatory recurrent  
156 synapses and cholinergic modulation in rat hippocampal region CA3. *Journal of Neuroscience* **15**(7):5249-5262.
